# Supplementary material
Source: Springer Nature journal article supplement (https://www.springermedizin.de/resource/supplementary/12872_2014_748_MOESM3_ESM.pdf/9430802)

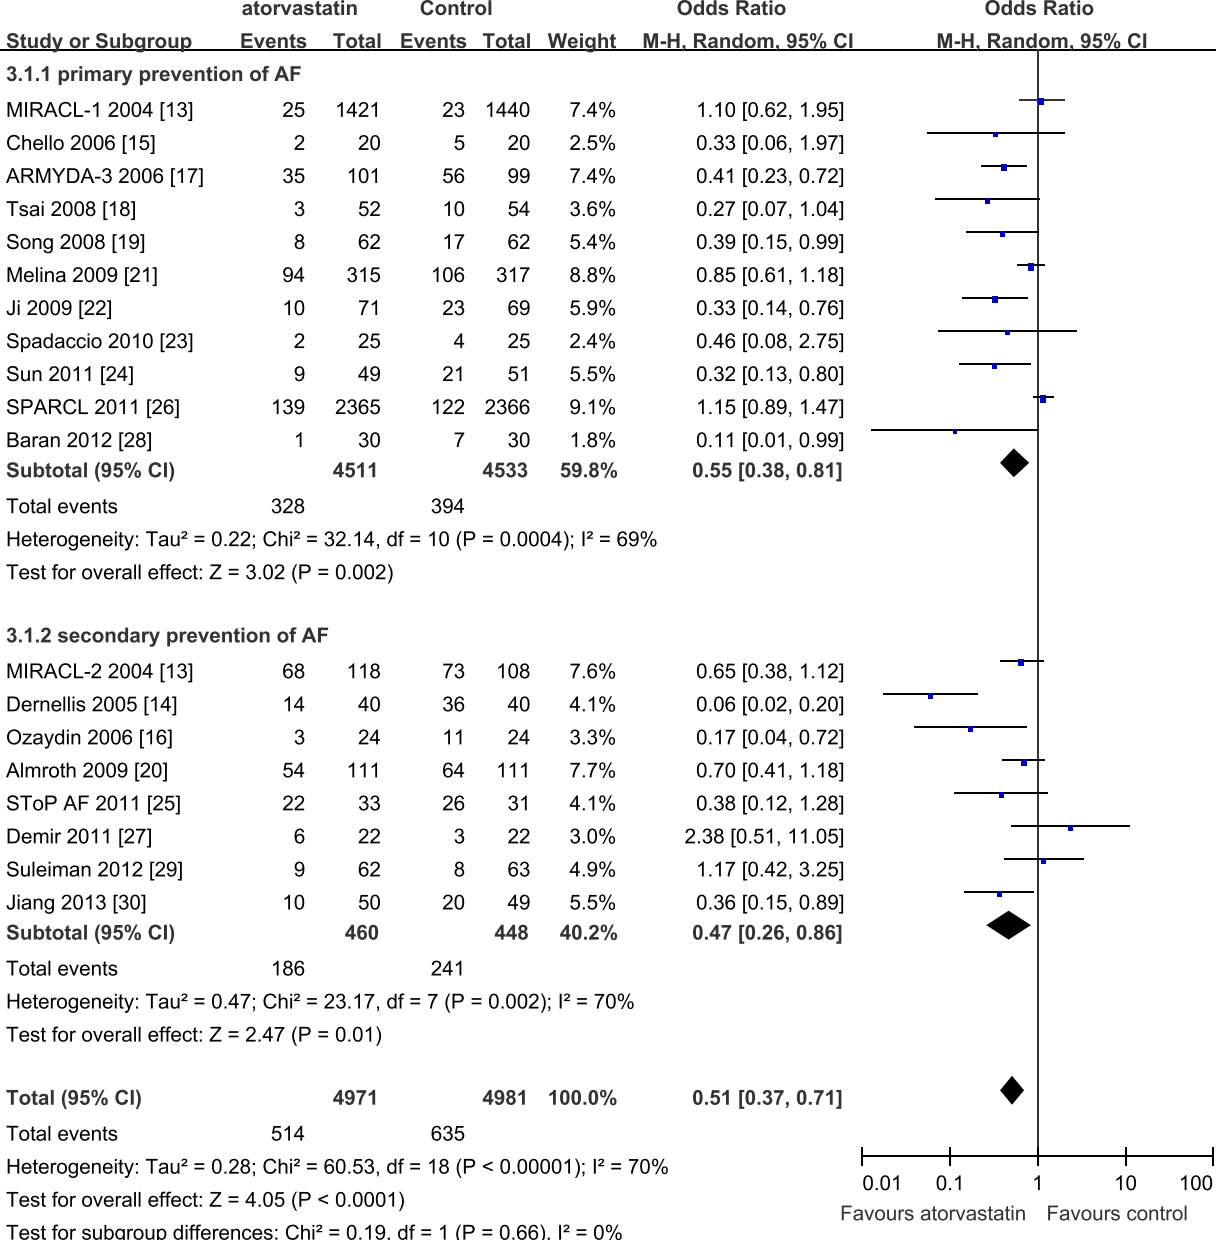

Supplement: MOESM3 [file 9430802]
